# Supplementary material for: Genome-Wide Fitness and Expression Profiling Implicate Mga2 in Adaptation to Hydrogen Peroxide
Source: PubMed Central journal article supplement (PMC2676504; doi:10.1371/journal.pgen.1000488), 2009-05-29

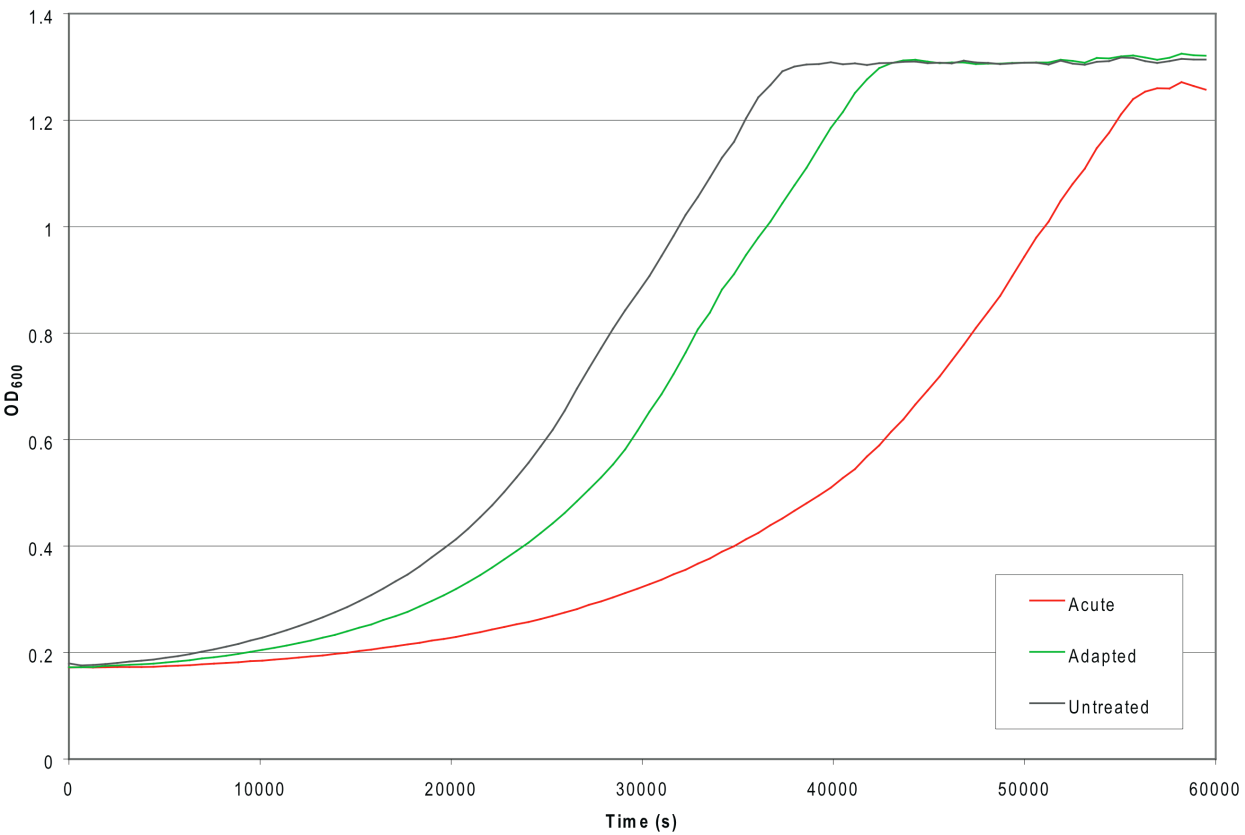

Supplement: pgen.1000488.s001.pdf [file pgen.1000488.s001.pdf]
