# Supplementary material for: Genome-Wide Fitness and Expression Profiling Implicate Mga2 in Adaptation to Hydrogen Peroxide
Source: PubMed Central journal article supplement (PMC2676504; doi:10.1371/journal.pgen.1000488), 2009-05-29
Supplement: pgen.1000488.s006.pdf [file pgen.1000488.s006.pdf]

|                     | <b>Sensitive Gene Ontology Categories</b>                  |
|---------------------|------------------------------------------------------------|
| <i>Thorpe et al</i> | mitochondrial ribosome(C)                                  |
|                     | aerobic respiration(P)                                     |
|                     | mitochondrial protein processing(P)                        |
|                     | nucleoid(C)                                                |
|                     | mitochondrial respiratory chain complex III(C)             |
|                     | tRNA aminoacylation for protein translation(P)             |
|                     | mitochondrial genome maintenance(P)                        |
|                     |                                                            |
| <i>Kelley et al</i> | mitochondrial ribosome(C)                                  |
|                     | aerobic respiration(P)                                     |
|                     | mitochondrial transport(P)                                 |
|                     | protein processing(P)                                      |
|                     | small ribosomal subunit(C)                                 |
|                     | double-strand break repair via homologous recombination(P) |
|                     | mitochondrial genome maintenance(P)                        |
|                     | endosome membrane(C)                                       |
|                     | tRNA aminoacylation for protein translation(P)             |
|                     | double-strand break repair via single-strand annealing(P)  |
