# Supplementary material for: Genome-Wide Fitness and Expression Profiling Implicate Mga2 in Adaptation to Hydrogen Peroxide
Source: PubMed Central journal article supplement (PMC2676504; doi:10.1371/journal.pgen.1000488), 2009-05-29
Supplement: pgen.1000488.s007.pdf [file pgen.1000488.s007.pdf]

| Study   | Rank | Transcription Factor | Score |
|---------|------|----------------------|-------|
| Kelley  | 1    | Mns2                 | 139.7 |
|         | 2    | Yap1                 | 136.0 |
|         | 3    | Msn4                 | 124.7 |
|         | 4    | Adr1                 | 66.5  |
|         | 5    | Hsf1                 | 42.7  |
|         | 6    | Pdr1                 | 42.6  |
|         | 7    | Pdr3                 | 42.5  |
|         | 8    | Skn7                 | 35.6  |
|         | 9    | Mig1                 | 32.7  |
|         |      |                      |       |
| Gasch   | 1    | Msn2                 | 128.4 |
|         | 2    | Msn4                 | 124.6 |
|         | 3    | Yap1                 | 75.3  |
|         | 4    | Pdr1                 | 44.3  |
|         | 5    | Adr1                 | 38.6  |
|         | 6    | Pdr3                 | 38.2  |
|         | 7    | Mig1                 | 26.1  |
|         | 8    | Cad1                 | 25.7  |
|         | 9    | Tos8                 | 22.5  |
|         |      |                      |       |
| Causton | 1    | Msn2                 | 136.4 |
|         | 2    | Msn4                 | 132.2 |
|         | 3    | Yap1                 | 80.8  |
|         | 4    | Adr1                 | 53.5  |
|         | 5    | Mig1                 | 39.0  |
|         | 6    | Pdr1                 | 37.7  |
|         | 7    | Cad1                 | 35.6  |
|         | 8    | Pdr3                 | 35.3  |
|         | 9    | Sps18                | 29.0  |
|         |      |                      |       |
| Shapira | 1    | Msn2                 | 89.8  |
|         | 2    | Msn4                 | 89.5  |
|         | 3    | Yap1                 | 61.1  |
|         | 4    | Hsf1                 | 34.1  |
|         | 5    | Pdr3                 | 34.1  |
|         | 6    | Adr1                 | 24.1  |
|         | 7    | Pdr1                 | 23.5  |
|         | 8    | Gis1                 | 22.1  |
