# Supplementary material for: Genome-Wide Fitness and Expression Profiling Implicate Mga2 in Adaptation to Hydrogen Peroxide
Source: PubMed Central journal article supplement (PMC2676504; doi:10.1371/journal.pgen.1000488), 2009-05-29
Supplement: pgen.1000488.s008.pdf [file pgen.1000488.s008.pdf]

| Gene Ontology Categories |                                            |                                                              |
|--------------------------|--------------------------------------------|--------------------------------------------------------------|
|                          | Up-regulated                               | Down-regulated                                               |
| Kelley                   | proteasome complex(C)                      | cytosolic large ribosomal subunit(C)                         |
|                          | response to toxin(P)                       | small subunit processome(C)                                  |
|                          | response to oxidative stress(P)            | maturation of SSU-rRNA(P)                                    |
|                          | pentose metabolic process(P)               | ribosomal large subunit biogenesis and assembly(P)           |
|                          | carbohydrate catabolic process(P)          | cytosolic small ribosomal subunit(C)                         |
|                          | alcohol catabolic process(P)               | ribosome assembly(P)                                         |
|                          | aldehyde metabolic process(P)              | ribonucleoside monophosphate metabolic process(P)            |
|                          | glycogen metabolic process(P)              | nucleobase metabolic process(P)                              |
|                          | mitochondrial intermembrane space(C)       | DNA-directed RNA polymerase I complex(C)                     |
|                          |                                            |                                                              |
| Gasch                    | aldehyde metabolic process(P)              | cytosolic large ribosomal subunit(C)                         |
|                          | response to oxidative stress(P)            | cytosolic small ribosomal subunit(C)                         |
|                          | response to toxin(P)                       | ribosomal subunit assembly(P)                                |
|                          | mitochondrial intermembrane space(C)       | ribosomal large subunit biogenesis and assembly(P)           |
|                          | glutathione metabolic process(P)           | cell wall(C)                                                 |
|                          | pentose metabolic process(P)               | amine transport(P)                                           |
|                          | amino acid derivative catabolic process(P) | carboxylic acid transport(P)                                 |
|                          | carbohydrate catabolic process(P)          | snRNA metabolic process(P)                                   |
|                          | vitamin biosynthetic process(P)            | U4/U6 x U5 tri-snRNP complex(C)                              |
|                          |                                            |                                                              |
| Shapiro                  | response to oxidative stress(P)            | cytosolic large ribosomal subunit(C)                         |
|                          | aldehyde metabolic process(P)              | cytosolic small ribosomal subunit(C)                         |
|                          | trehalose metabolic process(P)             | ribosomal large subunit biogenesis and assembly(P)           |
|                          | response to toxin(P)                       | ribosome assembly(P)                                         |
|                          | siderophore transport(P)                   | ribosomal small subunit biogenesis and assembly(P)           |
|                          | vacuolar lumen(C)                          | small subunit processome(C)                                  |
|                          | amino acid derivative catabolic process(P) | ribonucleoside monophosphate biosynthetic process(P)         |
|                          | proteasome complex(C)                      | maturation of SSU-rRNA from tricistronic rRNA transcript(P)  |
|                          | sulfur metabolic process(P)                | nucleolar preribosome(C)                                     |
|                          |                                            |                                                              |
| Causton                  | response to oxidative stress(P)            | cytosolic large ribosomal subunit(C)                         |
|                          | response to toxin(P)                       | cytosolic small ribosomal subunit(C)                         |
|                          | pentose metabolic process(P)               | small subunit processome(C)                                  |
|                          | carbohydrate catabolic process(P)          | ribosomal large subunit biogenesis and assembly(P)           |
|                          | trehalose metabolic process(P)             | ribosome assembly(P)                                         |
|                          | alcohol catabolic process(P)               | maturation of SSU-rRNA(P)                                    |
|                          | aldehyde metabolic process(P)              | cleavages during rRNA processing(P)                          |
|                          | glutathione metabolic process(P)           | maturation of 5.8S rRNA from tricistronic rRNA transcript(P) |
|                          |                                            |                                                              |
