# Supplementary material for: Genome-Wide Fitness and Expression Profiling Implicate Mga2 in Adaptation to Hydrogen Peroxide
Source: PubMed Central journal article supplement (PMC2676504; doi:10.1371/journal.pgen.1000488), 2009-05-29
Supplement: pgen.1000488.s009.pdf [file pgen.1000488.s009.pdf]

| <b>Gene</b> | <b>Orientation</b> | <b>Sequence</b>               |
|-------------|--------------------|-------------------------------|
| OLE1        | Forward            | 5'-TGGGGACAAACAAACCTTCTTG-3'  |
|             | Reverse            | 5'-AAAGCCTTGGTAGCGTCCTT-3'    |
| FAS1        | Forward            | 5'-TGTTCTTTTCCATTCCACCT-3'    |
|             | Reverse            | 5'-GGCCAATCTAGCAACCTTCA-3'    |
| SEC62       | Forward            | 5'-TCATTGGTGTCGTGTCCATC-3'    |
|             | Reverse            | 5'-ATCCAGAACCCACCAACATC-3'    |
| ACT1        | Forward            | 5'-TATTGCCGAAAGAATGCAAA-3'    |
|             | Reverse            | 5'-GGAAGGTAGTCAAAGAAGCCAAG-3' |
